1 **Type of the Paper: Article**

2

3 **Title: HIV and Pregnancy among Adolescents in Sub-Saharan Africa: A Scoping Review**

4 **Folahanmi Tomiwa Akinsolu<sup>1,2\*</sup>, Ifeoluwa Eunice Adewole<sup>1</sup>, Abisola Lawale<sup>1</sup>, Mobolaji**  
5 **Timothy Olagunju<sup>3</sup>, Olunike Rebecca Abodunrin<sup>1,3</sup>, Oluwabukola Mary Ola<sup>1</sup>, Abel**  
6 **Nnamdi Chukwuemeka<sup>1</sup>, Aisha Oluwaseun Gambari<sup>1,2</sup>, George Uchenna Eleje<sup>7</sup>, and Oliver**  
7 **Chukwujekwu Ezechi<sup>1,2</sup>**

8

9 <sup>1</sup>Lead City University, Ibadan

10 <sup>2</sup>Nigerian Institute of Medical Research, Lagos

11 <sup>3</sup>Nanjing Medical University, Jiangning, Jiangsu Province, China.

12 <sup>4</sup>University of Cape Town, South Africa

13 <sup>5</sup>Health Economics Unit, School of Public Health and Family Medicine, Faculty of Health  
14 Sciences, University of Cape Town

15 <sup>6</sup>Department of Medical Microbiology, Babcock University Teaching Hospital, Ogun State,  
16 Nigeria

17 <sup>7</sup>Nnamdi Azikiwe University Teaching Hospital, Nnewi, Nigeria

18

19

20 Folahanmi Tomiwa. Akinsolu<sup>1,2,\*</sup>,

21 <sup>1</sup>Lead City University, Ibadan

22 <sup>2</sup>Nigerian Institute of Medical Research, Lagos

23 Email: [akinsolu.folahanmi@lcu.edu.ng](mailto:akinsolu.folahanmi@lcu.edu.ng), [Folahanmi.tomiwa@gmail.com](mailto:Folahanmi.tomiwa@gmail.com)

24 ORCID: 0000-0002-6782-9820

25

26 Abisola Lawale<sup>1</sup>,

27 <sup>1</sup>Lead City University, Ibadan

28 Email: [abisola.lawale@gmail.com](mailto:abisola.lawale@gmail.com)

29 ORCID: 0009-0006-2449-5433

30

31 Ifeoluwa Eunice Adewole<sup>1</sup>,

32 <sup>1</sup>Lead City University, Ibadan

33 Email: [thefeoluwa@gmail.com](mailto:thefeoluwa@gmail.com)

34 ORCID: 0000-0003-3992-1205

35

36 Olunike Rebecca Abodunrin<sup>1,3</sup>,

37 <sup>1</sup>Lead City University, Ibadan

38 <sup>3</sup>Nanjing Medical University, Jiangsu Province, China.

39 Email: [abodunrinolunike@gmail.com](mailto:abodunrinolunike@gmail.com)

40 ORCID: 0009-0000-5258-1220

41

42 Mobolaji Timothy Olagunju<sup>3</sup>,

43 <sup>3</sup>Nanjing Medical University, Jiangsu Province, China.

44 Email: [olagunjumobolaji@gmail.com](mailto:olagunjumobolaji@gmail.com)

45 ORCID: 0009-0001-5064-9444

46

47 Oluwabukola Mary Ola<sup>1</sup>

48 <sup>1</sup>Lead City University, Ibadan

49 Email: [olaoluwabukolamary@gmail.com](mailto:olaoluwabukolamary@gmail.com)

50 ORCID: 0009-0005-8766-2852

51

52 Abel Nnamdi Chukwuemeka<sup>1</sup>

53 <sup>1</sup>Lead City University, Ibadan

54 Email: [adoncollion@gmail.com](mailto:adoncollion@gmail.com)

55 ORCID: 0000-0003-1461-5711

56

57 Aisha Oluwaseun Gambari<sup>1,2</sup>

58 <sup>1</sup>Lead City University, Ibadan

59 <sup>2</sup>Nigerian Institute of Medical Research, Lagos

60 Email: [ayeeshagambari@gmail.com](mailto:ayeeshagambari@gmail.com)

61

62 George Uchenna Eleje<sup>7</sup>,

63 <sup>7</sup>Nnamdi Azikiwe University Teaching Hospital (NAUTH), Nnewi, Nigeria,

64 Email: [elejegerge1@gmail.com](mailto:elejegerge1@gmail.com)

65

66 Oliver Chukwujekwu Ezechi<sup>1,2</sup>,

67 <sup>1</sup>Lead City University, Ibadan

68 <sup>2</sup>Nigerian Institute of Medical Research, Lagos

69 Email: [oezechi@nimr.gov.ng](mailto:oezechi@nimr.gov.ng), [oezechi@yahoo.co.uk](mailto:oezechi@yahoo.co.uk)

70 ORCID: 0000-0003-0688-3898

71

72 \*Corresponding Author

73 Ifeoluwa Eunice Adewole

74 [theifeoluwa@gmail.com](mailto:theifeoluwa@gmail.com) (I.A)

75 ORCID: 0000-0003-3992-1205

76

77 **ABSTRACT**

78 The interaction of adolescent pregnancy with HIV is a complex and crucial public health issue  
79 worldwide. This is evident in sub-Saharan Africa, where the co-occurrence of HIV and  
80 adolescent pregnancies represents a high risk for additional health and social consequences for  
81 both adolescent mothers and their children. This study aims to explore literature to provide a  
82 clear synthesis of data related to pregnancies among adolescents living with HIV in Sub-Saharan  
83 Africa.

84 A literature search was conducted in July 2023 using PubMed, Scopus, CINAHL, Cochrane  
85 Library, African Journals Online, and World Health Organization Global Index Medicus. Two  
86 authors screened potential studies. Articles selected were those published in or translated into the  
87 English language between 2002 and 2022.

88 Among 1,560 identified results, 25 peer-reviewed publications on pregnancy among adolescents  
89 living with HIV in Sub-Saharan Africa were included after screening. The studies, included both  
90 qualitative and quantitative data, with a total of 178,227 participants in the age range of 12-18  
91 years. The majority of the studies reported quantitative data, while a few presented qualitative or  
92 mixed-methods findings.

93 This scoping review highlights disparities in pregnancy prevalence, revealing varied rates among  
94 different age groups. The underrepresentation of adolescents in demographic studies suggests  
95 diverse vulnerabilities and access to healthcare. The study also emphasizes the need for tailored  
96 healthcare services and comprehensive interventions addressing HIV risk, mental health  
97 challenges, and socio-economic barriers.

98

99 **Keywords: Adolescent, Pregnancy, Sub-Saharan Africa, Human Immunodeficiency Virus**

100

101 **INTRODUCTION**

102 Global estimates show that every year, approximately 21 million pregnancies and 12 million  
103 births occur among adolescents in low- and middle-income countries [1]. Sub-Saharan Africa is  
104 responsible for some of the highest rates of adolescent pregnancies globally [2], with almost one  
105 in five females experiencing pregnancy between the ages of 10 and 19 [3].

106 Adolescent parents and pregnant adolescents face the challenge of managing pregnancy,  
107 parenting, and child-rearing responsibilities amid a comprehensive developmental phase often  
108 characterized by substantial psychological, social, and biological changes [4].

109 Furthermore, adolescents make up a large proportion of the people living with HIV globally  
110 (1.18 million-2.19 million). In 2022, 140,000 adolescents aged 10 to 19 were newly infected  
111 with HIV, with girls accounting for about 80% of them [5]. Particularly in Sub-Saharan Africa,  
112 nearly six times the number of newly acquired HIV infections occur among adolescent girls.

113 Adolescents are considerably more vulnerable to HIV infection compared to adults, given their  
114 ongoing developmental stage and the necessity to adapt to rapid biological, physical, and  
115 structural changes in their lives [5, 6]. The interaction of adolescent pregnancy with HIV is a  
116 complex and crucial public health issue worldwide. This is evident in sub-Saharan Africa, where  
117 the co-occurrence of HIV and adolescent pregnancies represents a high risk for additional health  
118 and social consequences for both adolescent mothers and their children [7].

119 With the high rates of early motherhood and HIV incidence in sub-Saharan Africa, designing  
120 targeted interventions, enhancing reproductive health services, and encouraging improved  
121 overall health outcomes are largely hinged on having this clear understanding of pregnancies  
122 among adolescents living with HIV in Sub-Saharan Africa. Thus, this scoping review aims to

- 123 explore existing literature to provide a clear synthesis of data related to pregnancies among
- 124 adolescents living with HIV in Sub-Saharan Africa.

## 125 **MATERIALS AND METHODS**

### 126 **Overview**

127 This review was guided by the methodological framework of Arksey and O'Malley [8]. Thus,  
128 the five steps followed were: (i) identifying the research question, (ii) identifying relevant  
129 studies, (iii) selecting eligible studies, (iv) charting the data, and (v) collating and summarizing  
130 the results. Appraisal of data quality was not done as the intention was to map all research  
131 activities in the field. The preferred reporting items for systematic reviews and meta-analyses  
132 extension for scoping reviews (PRISMA-ScR) checklist [9] was utilized with mapping done  
133 using the PRISMA-P chart [10].

134 We conducted a scoping review to synthesize all available evidence on pregnancies among  
135 adolescents aged 10 to 19 living with HIV in various Sub-Saharan African countries. A  
136 comprehensive search was conducted across major electronic databases, including PubMed,  
137 Scopus, CINAHL, Web of Science, and the World Health Organization Global Index Medicus,  
138 for studies published from 2002 up to December 2022. The scoping review adhered to the  
139 Preferred Reporting Items for Systematic Reviews and Meta-Analyses Extension for Scoping  
140 Reviews (PRISMA-ScR) guidelines [10] to ensure methodological rigour and transparency.

141 Articles published in English and reporting original data on pregnancies among adolescents  
142 living with HIV in Sub-Saharan Africa were included. Study selection and data extraction were  
143 conducted independently by four reviewers (O.O, O.A, A.L and I.A) to ensure the reliability of  
144 the findings. Conflicts were resolved by a fifth reviewer (F.T).

### 145 **Articles Identification**

146 The initial search was conducted in July 2023 across major electronic databases, including  
147 PubMed, Scopus, Google Scholar, and the World Health Organization Global Index Medicus, for  
148 studies published from 2002 up to December 2022. The search was performed using the  
149 following search strategies enumerated in Appendix 1, combining keywords and Medical Subject  
150 Heading (MeSH) terms: “pregnancy”, “adolescents”, “HIV”, and “Sub-Saharan Africa”. The  
151 search strategy was refined to further check the appropriateness of the keywords and was  
152 expanded to include “females”, “prevalence”, “SSA”, “teenage pregnancy”, and “teenager”. A  
153 hand search was also conducted on the references of the included studies and websites of various  
154 postgraduate and undergraduate medical colleges to identify potentially relevant literature. The  
155 search and screening details are summarized with a graphical presentation using the PRISMA  
156 flow diagram in Figure 1. No protocol was published for this review.

157 The identification and analysis of data in this review was based on the  
158 Population/Exposure/Outcome (PEO) framework [11]. This framework was used to structure the  
159 review process by identifying key components of the main research question, which are  
160 population, exposure and outcome. In this review, the population of interest were adolescents  
161 living with HIV in Sub-Saharan Africa, the exposure is HIV status among adolescents in Africa,  
162 and the outcome is the prevalence of pregnancy among adolescents living with HIV in Africa.

163

## 164 **Search strategy**

165 To achieve our study objectives, a comprehensive search was conducted across major electronic  
166 databases, including PubMed, Scopus, Google Scholar, and the World Health Organization  
167 Global Index Medicus, for studies published from 2002 up to December 2022.

168 In this scoping review, we searched for studies that reported pregnancy among female  
169 adolescents living with HIV in Sub-Saharan Africa. The search was conducted on studies  
170 published between 2002 and 2022 to obtain recent data on pregnancies among female  
171 adolescents living with HIV in Sub-Saharan Africa and its associated risk factors (Appendix 1).

## 172 **Eligibility Criteria and Article Selection**

173 The literature obtained through database searches was imported into the reference management  
174 website, Rayyan.ai. In Rayyan, duplicates were removed using the "duplicates items" function.  
175 Two independent reviewers (M. O and I.A) conducted title and abstract screening, following the  
176 eligibility criteria set for this review, according to the PEO framework [11]. Full-text review of  
177 the remaining publications was then completed independently by four researchers (O.O, O.A,  
178 A.L and I.A) with reasons for inclusion or exclusion noted. Conflicts were resolved by F.T.  
179 Inclusion criteria required that the publications be in English and have full texts available to  
180 extract all relevant information. Studies were excluded if they were grey literature, theses,  
181 abstracts only or published before January 2002. Studies published between January 2002 and  
182 December 2022 were considered for inclusion. The titles and abstracts were used to screen the  
183 articles. Studies that do not report the following were excluded: pregnancy in adolescents living  
184 with HIV in a Sub-Saharan African Country; HIV status; sample size; lack primary data or well-



185 defined methodology; duplicated samples and case-control studies and clinical trials; participants  
186 not adolescents; non-Sub-Saharan African women of known HIV status.

## 187 **Data Charting**

188 From the publications included in this review, information on the paper identifiers (title, author,  
189 link), the country, year of publication, study aim, study design, study location, HIV status,  
190 adolescent pregnancy, and study findings were extracted. The extracted information from each  
191 publication was compiled and summarized in Table 1.

## 192 **RESULTS**

### 193 **Socio-demographic Characteristics of Participants**

194 Figure 1 provides a Prisma Flow diagram for the study. Of the 1,560 results identified through  
195 databases (n=1,533) and hand-searching (n=27), 68 duplicates were removed, title and abstract  
196 screening for keywords relating to the topic of interest was undertaken for all articles and 52  
197 documents were identified for full-text review. Ultimately, 27 full-text documents were excluded  
198 due to lack of relevance, a lack of data from relevant geographical locations, or not reporting on  
199 the age range of interest. In total, 25 peer-reviewed publications reported data on pregnancy  
200 among HIV-positive adolescent mothers (10–19 years) that spoke to the domains of focus  
201 (Figure 1).

202

203 **Characteristics of Included Studies**

204 The studies that were included reported qualitative and quantitative data on the experiences of  
205 adolescent mothers affected by HIV from sub-Saharan African countries: 12 studies from South  
206 Africa [4,11,12,13,15,22,23,24,25,26,29,32], 2 from Malawi [17,21], 1 from Zimbabwe [16], 6  
207 Kenyan studies [18,20,27,31,33,34] (n=6), 1 from Lesotho [28] 1 from Uganda [19], and 2 multi-  
208 country studies [14, 30].

209 The majority of the studies reported on quantitative data  
210 [4,11,12,14,15,17,18,19,20,22,24,26,28,29,31,32,33,34], five reported qualitative data  
211 [13,21,25,27,30], and one study used mixed methods [16]. The total number of participants  
212 included is 178,227, and the age range is between 12-18 years.

213

214 **Table 1: Summary of included studies**

| S/<br>N | Title                                                                                  | Reference                 | Country      | Aim                                                                                                                           | Study type         | Adolescent<br>Pregnancy<br>Prevalence | HIV<br>Prevalence | Key Findings                                                                                                                                                                                                                                                                                                              |
|---------|----------------------------------------------------------------------------------------|---------------------------|--------------|-------------------------------------------------------------------------------------------------------------------------------|--------------------|---------------------------------------|-------------------|---------------------------------------------------------------------------------------------------------------------------------------------------------------------------------------------------------------------------------------------------------------------------------------------------------------------------|
| 1       | Prevalence and Risk Factors of Repeat Pregnancy among South African Adolescent Females | Govender et al, 2019 [12] | South Africa | This study set out to establish the prevalence and risk factors of repeat pregnancies among South African adolescent females. | Quantitative study | 100%                                  | 17.8%             | <ul style="list-style-type: none"> <li>• 19.9% had experienced a repeat pregnancy.</li> <li>• The risk factors include a history of spontaneous abortion, previous contraceptive use.</li> <li>• A higher level of education and emotional support from family were found to be significant protective factors</li> </ul> |

|   |                                                                                                        |                           |              |                                                                                                                                                                                                                                        |                    |      |       |                                                                                                                                                                                                                                                                                   |
|---|--------------------------------------------------------------------------------------------------------|---------------------------|--------------|----------------------------------------------------------------------------------------------------------------------------------------------------------------------------------------------------------------------------------------|--------------------|------|-------|-----------------------------------------------------------------------------------------------------------------------------------------------------------------------------------------------------------------------------------------------------------------------------------|
|   |                                                                                                        |                           |              |                                                                                                                                                                                                                                        |                    |      |       | against adolescent repeat pregnancy.                                                                                                                                                                                                                                              |
| 2 | Prevalence of repeat pregnancies and associated factors among teenagers in KwaZulu-Natal, South Africa | Mphatswe et al, 2016 [13] | South Africa | To determine the prevalence of repeat teenage pregnancy and the interval between first/most recent and repeat pregnancies, as well as to evaluate the sexual/reproductive health characteristics of teenagers with repeat pregnancies. | Quantitative study | 100% | 13.3% | <ul style="list-style-type: none"> <li>• 82.4% were seen for a first pregnancy and 17.6% for a repeat pregnancy.</li> <li>• Only 17.0% participants had previously used contraception 93.1% of whom stopped within 12months and 8.2% had used emergency contraception.</li> </ul> |

|   |                                                                                                                                  |                           |                  |                                                                                                                                                                   |                    |       |      |                                                                                                                                                                                                                                                                                                                              |
|---|----------------------------------------------------------------------------------------------------------------------------------|---------------------------|------------------|-------------------------------------------------------------------------------------------------------------------------------------------------------------------|--------------------|-------|------|------------------------------------------------------------------------------------------------------------------------------------------------------------------------------------------------------------------------------------------------------------------------------------------------------------------------------|
| 3 | The Needs of HIV-positive Teenage Mothers within a South African socio-cultural Context: Experiences of social service providers | Slabbert et al, 2022 [14] | South Africa     | To explore and describe the experiences of social service providers in supporting the basic needs of HIV-positive teenage mothers in a rural area in South Africa | Qualitative Study  |       |      | <ul style="list-style-type: none"> <li>• HIV positive teenage mothers have several needs and lack basic human needs and services</li> <li>• Socio-cultural factors such as early marriage, lack of parental guidance, and gender power imbalances also contribute to teenage pregnancies and positive HIV status.</li> </ul> |
| 4 | Adolescent Mothers in                                                                                                            | Groves et al, 2021        | Eswatini, Kenya, | To examine the intersection between                                                                                                                               | Quantitative Study | 17.4% | 3.3% | <ul style="list-style-type: none"> <li>• Nearly one fifth of adolescent girls were</li> </ul>                                                                                                                                                                                                                                |

|   |                                                                                                           |                      |                                                                                    |                                                                                                                                                               |                    |                          |      |                                                                                                                                                                                                                                                                                                                                                   |
|---|-----------------------------------------------------------------------------------------------------------|----------------------|------------------------------------------------------------------------------------|---------------------------------------------------------------------------------------------------------------------------------------------------------------|--------------------|--------------------------|------|---------------------------------------------------------------------------------------------------------------------------------------------------------------------------------------------------------------------------------------------------------------------------------------------------------------------------------------------------|
|   | Eastern and Southern Africa: An Overlooked and Uniquely Vulnerable Subpopulation in the Fight Against HIV | [15]                 | Lesotho, Malawi, Mozambique, South Africa, Tanzania, Uganda, Zambia, and Zimbabwe. | adolescent motherhood and HIV infection across 10 Eastern and Southern African countries, where over half of all HIV infections occur among adolescent girls. |                    |                          |      | <p>mothers, and the HIV prevalence among all adolescent girls was 3.3%.</p> <ul style="list-style-type: none"> <li>Relative to nonmothers, adolescent mothers were, on average, older, poorer, and more likely to be married, rural dwellers, and household heads. Adolescent motherhood was positively associated with HIV infection.</li> </ul> |
| 5 | The next generation:                                                                                      | Anderson et al, 2021 | South                                                                              | To describe characteristics of                                                                                                                                | Quantitative Study | 38.8% ( $\leq 16$ years) | 100% | <ul style="list-style-type: none"> <li>258 pregnancies were identified, with 38.8%,</li> </ul>                                                                                                                                                                                                                                                    |

|  |                                                                                                |             |               |                                                              |                   |                              |  |                                                                                                                                                                                                                                                                                                                                                                                                                                                                      |
|--|------------------------------------------------------------------------------------------------|-------------|---------------|--------------------------------------------------------------|-------------------|------------------------------|--|----------------------------------------------------------------------------------------------------------------------------------------------------------------------------------------------------------------------------------------------------------------------------------------------------------------------------------------------------------------------------------------------------------------------------------------------------------------------|
|  | <p>Pregnancy in adolescents and women living with perinatally acquired HIV in South Africa</p> | <p>[16]</p> | <p>Africa</p> | <p>pregnant African YLPHIV and their pregnancy outcomes.</p> | <p>South (SA)</p> | <p>39.1% (17 - 19 years)</p> |  | <p>39.1%, and 22.1% occurring in young females aged <math>\leq 16</math> years, 17–19 years, and <math>&gt;20</math> years.</p> <ul style="list-style-type: none"> <li>• Antiretroviral therapy initiation was observed in 84.9% before pregnancy, 6.6% during pregnancy, and 8.5% by pregnancy end. Outcomes revealed that 80.3% resulted in live births, 14.4% in terminations, and 2.2% in stillbirths, with a 2.2% mother-to-child transmission rate.</li> </ul> |
|--|------------------------------------------------------------------------------------------------|-------------|---------------|--------------------------------------------------------------|-------------------|------------------------------|--|----------------------------------------------------------------------------------------------------------------------------------------------------------------------------------------------------------------------------------------------------------------------------------------------------------------------------------------------------------------------------------------------------------------------------------------------------------------------|

|   |                                                                                                                         |                          |          |                                                                                                                                         |                     |       |       |                                                                                                                                                                                                                                  |
|---|-------------------------------------------------------------------------------------------------------------------------|--------------------------|----------|-----------------------------------------------------------------------------------------------------------------------------------------|---------------------|-------|-------|----------------------------------------------------------------------------------------------------------------------------------------------------------------------------------------------------------------------------------|
| 6 | Pregnancy and childbearing among Adolescents and Young Persons Living with HIV (YPLWH): The Case of Chitungwiza, Harare | Makunika, 2021 [17]      | Zimbabwe | To highlight the sexual and reproductive health issues affecting young people living with HIV pertaining to childbearing and pregnancy. | Mixed Methods Study |       | 100%  | <ul style="list-style-type: none"> <li>• sexual and reproductive health (SRH) knowledge heavily impacts YPLWH's decision to have children.</li> <li>• Status disclosure has direct impact on decision for condom use.</li> </ul> |
| 7 | HIV, sexual violence, and termination                                                                                   | Bossard et al, 2022 [18] | Malawi   | To assess sexually transmitted infection (STI) prevalence,                                                                              | Quantitative        | 52.3% | 14.7% | <ul style="list-style-type: none"> <li>• The prevalence of HIV, other STIs, unwanted pregnancy, unsafe abortion,</li> </ul>                                                                                                      |



|   |                                                                                                          |                  |       |                                                                                                                                                                                     |                    |       |      |                                                                                                                                                                                                                                                                                           |
|---|----------------------------------------------------------------------------------------------------------|------------------|-------|-------------------------------------------------------------------------------------------------------------------------------------------------------------------------------------|--------------------|-------|------|-------------------------------------------------------------------------------------------------------------------------------------------------------------------------------------------------------------------------------------------------------------------------------------------|
|   | of pregnancy among adolescent and adult female sex workers in Malawi: A respondent-driven sampling study |                  |       | progress towards UNAIDS 90-90-90 HIV targets, and SRH care behaviours in a region with established HIV and SRH services tailored to the distinct needs of Female Sex Worker (FSWs). |                    |       |      | and sexual violence are extremely high. <ul style="list-style-type: none"> <li>• Peer-led approaches contributed to levels of ART coverage and HIV status awareness similar to those found in the general district population, despite the challenges and risks faced by FSWs.</li> </ul> |
| 8 | Prevalence of Pregnancy among Adolescent                                                                 | Awuor, 2021 [19] | Kenya | To find out the prevalence of pregnancy in adolescent living                                                                                                                        | Quantitative Study | 25.5% | 100% | <ul style="list-style-type: none"> <li>• 25.5% had pregnancy history in which, 10.2% had knowledge of PMTCT, while only 4.1% were</li> </ul>                                                                                                                                              |

|   |                                                             |                   |              |                                                                                                                                                 |                    |       |       |                                                                                                                                                                                                                                                                                                                                                                    |
|---|-------------------------------------------------------------|-------------------|--------------|-------------------------------------------------------------------------------------------------------------------------------------------------|--------------------|-------|-------|--------------------------------------------------------------------------------------------------------------------------------------------------------------------------------------------------------------------------------------------------------------------------------------------------------------------------------------------------------------------|
|   | Living with HIV in Muhoroni Sub County Kisumu County, Kenya |                   |              | with HIV, review evidence about Antenatal Care (ANC) service delivery and outcomes for HIV-infected pregnant adolescents in Muhoroni Sub County |                    |       |       | <p>having knowledge of PNS</p> <ul style="list-style-type: none"> <li>• All the pregnant girls had knowledge on both ANC and Drug adherence</li> <li>• 10.2% of pregnancies were planned while 15.3% were unplanned which 10.2% of pregnancies were aborted, and 11 (11.2%) were delivered safely, while 4 (4.1%) of the girls were currently pregnant.</li> </ul> |
| 9 | Adolescent Motherhood and HIV in South Africa:              | Roberts, 2021 [4] | South Africa | To identify the prevalence of probable common mental disorder                                                                                   | Quantitative Study | 15.2% | 70.5% | <ul style="list-style-type: none"> <li>• Results identify higher mental health burden among adolescent mothers</li> </ul>                                                                                                                                                                                                                                          |

|    |                                                            |                              |        |                                                                                                                    |                       |      |      |                                                                                                                                                                                                                                                                                                                                                                           |
|----|------------------------------------------------------------|------------------------------|--------|--------------------------------------------------------------------------------------------------------------------|-----------------------|------|------|---------------------------------------------------------------------------------------------------------------------------------------------------------------------------------------------------------------------------------------------------------------------------------------------------------------------------------------------------------------------------|
|    | Examining<br>Prevalence of<br>Common<br>Mental<br>Disorder |                              |        | among adolescent<br>mothers and, among<br>adolescents<br>experiencing the<br>syndemic of<br>motherhood and<br>HIV. |                       |      |      | compared to never-pregnant<br>adolescents<br><br><ul style="list-style-type: none"> <li>• An increased prevalence of<br/>mental health burden among<br/>adolescent mothers living<br/>with HIV compared to other<br/>groups.</li> <li>• An elevated prevalence of<br/>mental health comorbidities<br/>among adolescent mothers<br/>irrespective of HIV status.</li> </ul> |
| 10 | Prevalence<br>and<br>predictors<br>for<br>unintended       | Napyo et<br>al, 2020<br>[20] | Uganda | To determine the<br>prevalence and<br>predictors for<br>unintended<br>pregnancy among                              | Quantitative<br>Study | 6.8% | 100% | <ul style="list-style-type: none"> <li>• The prevalence of<br/>unintended pregnancy was<br/>41.1%.</li> <li>• The predictors for</li> </ul>                                                                                                                                                                                                                               |

|    |                                                                                               |                                 |       |                                                                                                        |                    |       |      |                                                                                                                                                                                                      |
|----|-----------------------------------------------------------------------------------------------|---------------------------------|-------|--------------------------------------------------------------------------------------------------------|--------------------|-------|------|------------------------------------------------------------------------------------------------------------------------------------------------------------------------------------------------------|
|    | pregnancy among HIV-infected pregnant women in Lira, Northern Uganda: a cross-sectional study |                                 |       | HIV-infected pregnant women in Northern Uganda                                                         |                    |       |      | unintended pregnancy were: being single (not living with a partner or being in a marital union), having five or more children and taking antiretroviral drugs for long periods of time               |
| 11 | Maternal Health Care Utilization Among HIV-Positive Female                                    | Harriet Birungi et al 2011 [21] | Kenya | To examine maternal health care utilization among HIV-positive female adolescents enrolled in HIV/AIDS | Quantitative Study | 51.9% | 100% | <ul style="list-style-type: none"> <li>• The use of PMTCT services was less common than prenatal care services among HIV-positive female adolescents.</li> <li>• HIV-positive adolescents</li> </ul> |

|    |                                             |                         |        |                                                                         |                   |      |      |                                                                                                                                                                                                                                                                                   |
|----|---------------------------------------------|-------------------------|--------|-------------------------------------------------------------------------|-------------------|------|------|-----------------------------------------------------------------------------------------------------------------------------------------------------------------------------------------------------------------------------------------------------------------------------------|
|    | Adolescents<br>in Kenya                     |                         |        | programs in Kenya.                                                      |                   |      |      | were less likely to use maternal health care services for higher-order pregnancies than for lower-order pregnancies. They were, however, more likely to receive prenatal care and PMTCT services when their husband, rather than someone else, was responsible for the pregnancy. |
| 12 | “I would love if there was a young woman to | Carbone et al 2109 [22] | Malawi | examining barriers to, and facilitators of, PMTCT care for HIV-infected | Qualitative Study | 100% | 100% | <ul style="list-style-type: none"> <li>HIV-infected adolescent mothers expressed a preference for peer-led, non-judgmental PMTCT</li> </ul>                                                                                                                                       |

|  |                                                                                                                                                                                   |  |  |                                                                                                                                                                             |  |  |                                                                                                                                                                     |
|--|-----------------------------------------------------------------------------------------------------------------------------------------------------------------------------------|--|--|-----------------------------------------------------------------------------------------------------------------------------------------------------------------------------|--|--|---------------------------------------------------------------------------------------------------------------------------------------------------------------------|
|  | <p>encourage us, to ease our anxiety which we would have if we were alone”:</p> <p>Adapting the Mothers2Mothers Mentor Mother Model for adolescent mothers living with HIV in</p> |  |  | <p>AGYW in Malawi, and explore strategies for adapting the mothers2mothers (m2m) Mentor Mother Model to better meet AGYW service delivery-related needs and preferences</p> |  |  | <p>support services that bridge communities and facilities to pragmatically address barriers of stigma, poverty, health system complexity, and food insecurity.</p> |
|--|-----------------------------------------------------------------------------------------------------------------------------------------------------------------------------------|--|--|-----------------------------------------------------------------------------------------------------------------------------------------------------------------------------|--|--|---------------------------------------------------------------------------------------------------------------------------------------------------------------------|

|    |                                                                                                                             |                             |              |                                                                                                                             |                    |       |      |                                                                                                                                                                                                                                                                                                                                                                     |
|----|-----------------------------------------------------------------------------------------------------------------------------|-----------------------------|--------------|-----------------------------------------------------------------------------------------------------------------------------|--------------------|-------|------|---------------------------------------------------------------------------------------------------------------------------------------------------------------------------------------------------------------------------------------------------------------------------------------------------------------------------------------------------------------------|
|    | Malawi                                                                                                                      |                             |              |                                                                                                                             |                    |       |      |                                                                                                                                                                                                                                                                                                                                                                     |
| 13 | Early adolescent pregnancy increases risk of incident HIV infection in the Eastern Cape, South Africa: a longitudinal study | Christofide et al 2013 [23] | South Africa | To investigate the hypothesis that early adolescent pregnancy predicts incident HIV infections over two years of follow-up. | Quantitative Study |       |      | <ul style="list-style-type: none"> <li>• Early adolescent pregnancies increase the incidence of HIV among South African women.</li> <li>• The higher risk is associated with sexual risk behaviours such as higher partner numbers and a greater age difference with partners rather than a biological explanation of hormonal changes during pregnancy.</li> </ul> |
| 14 | Adolescent and young                                                                                                        | Fatti et al 2014 [24]       | South Africa | To explore risks associated with                                                                                            | Quantitative Study | 20.8% | 100% | <ul style="list-style-type: none"> <li>• An increasing proportion of pregnant HIV-positive</li> </ul>                                                                                                                                                                                                                                                               |

|                                                                                                                                                                       |  |  |                                                                                                                                                                                    |  |  |  |                                                                                                                        |
|-----------------------------------------------------------------------------------------------------------------------------------------------------------------------|--|--|------------------------------------------------------------------------------------------------------------------------------------------------------------------------------------|--|--|--|------------------------------------------------------------------------------------------------------------------------|
| <p>pregnant women at increased risk of mother-to-child transmission of HIV and poorer maternal and infant health outcomes: A cohort study at public facilities in</p> |  |  | <p>pregnancy in young HIV-infected women, we compared mother-to-child transmission (MTCT) of HIV and maternal and infant health outcomes according to maternal age categories.</p> |  |  |  | <p>women in NMBM were young, and they had increased MTCT and poorer maternal and infant outcomes than older women.</p> |
|-----------------------------------------------------------------------------------------------------------------------------------------------------------------------|--|--|------------------------------------------------------------------------------------------------------------------------------------------------------------------------------------|--|--|--|------------------------------------------------------------------------------------------------------------------------|



|     |                                                                                  |                      |              |                                                                                                                                          |                   |      |  |                                                                                                                                                                                                                                                                   |
|-----|----------------------------------------------------------------------------------|----------------------|--------------|------------------------------------------------------------------------------------------------------------------------------------------|-------------------|------|--|-------------------------------------------------------------------------------------------------------------------------------------------------------------------------------------------------------------------------------------------------------------------|
|     | the Nelson Mandela Bay Metropolitan district, Eastern Cape, South Africa         |                      |              |                                                                                                                                          |                   |      |  |                                                                                                                                                                                                                                                                   |
| 15. | Autonomy and infant feeding decision-making among teenage mothers in a rural and | Jama et al 2018 [25] | South Africa | To explore autonomy and infant feeding decision-making among teenage mothers in a rural and urban setting in KwaZulu-Natal, South Africa | Qualitative Study | 100% |  | <ul style="list-style-type: none"> <li>• Teenage mothers had knowledge about recommended feeding practices.</li> <li>• Most feeding advice shared by family members was inappropriate, leading to poor infant feeding practices among teenage mothers.</li> </ul> |

|    |                                                                                                                         |                     |              |                                                                                                                                                                                 |                   |      |      |                                                                                                                                                                                               |
|----|-------------------------------------------------------------------------------------------------------------------------|---------------------|--------------|---------------------------------------------------------------------------------------------------------------------------------------------------------------------------------|-------------------|------|------|-----------------------------------------------------------------------------------------------------------------------------------------------------------------------------------------------|
|    | urban setting in KwaZulu-Natal, South Africa                                                                            |                     |              |                                                                                                                                                                                 |                   |      |      | Returning to school and fear of breastfeeding in public were also barriers to exclusive breastfeeding.                                                                                        |
| 16 | “Motherhood Is Hard”: Exploring the Complexities of Unplanned Motherhood Among HIV-Positive Adolescents in South Africa | Josephine 2019 [26] | South Africa | To examine the complexities of unplanned motherhood among HIV-positive adolescent mothers and their coping strategies through drawing out aspects of their personal experiences | Qualitative Study | 100% | 100% | <ul style="list-style-type: none"> <li>HIV-positive adolescent mothers perceive unplanned motherhood as difficult and this negatively affects their future childbearing decisions.</li> </ul> |

|    |                                                                                                                           |                        |              |                                                                                               |                    |      |      |                                                                                                                                                                                                                                                                                                                      |
|----|---------------------------------------------------------------------------------------------------------------------------|------------------------|--------------|-----------------------------------------------------------------------------------------------|--------------------|------|------|----------------------------------------------------------------------------------------------------------------------------------------------------------------------------------------------------------------------------------------------------------------------------------------------------------------------|
| 17 | A longitudinal cohort study of rural adolescent vs adult South African mothers and their children from birth to 24 months | Roux et al 2019 [27]   | South Africa | To explore risk factors associated with unplanned teenage pregnancy in Zomba district, Malawi | Quantitative Study | 17%  | 6%   | <ul style="list-style-type: none"> <li>• In rural South Africa, almost one in five pregnant women is an adolescent.</li> <li>• Caretaking tasks influencing child growth, especially breastfeeding and securing the child grant appear as the greatest problems for adolescent compared to adult mothers.</li> </ul> |
| 18 | “If the mother does not know, there is no way she can                                                                     | Luseno et al 2019 [28] | Kenya        | To explore the challenges in promoting the health of these adolescents and preventing         | Qualitative study  | 100% | 100% | <ul style="list-style-type: none"> <li>• Adolescents frequently reported being alone during testing, experiencing fear and denial on receiving their results, and delaying</li> </ul>                                                                                                                                |

|  |                                                                                                                                                                             |  |  |                            |  |  |  |                                                                                                                                                                                                                                                                                                                                                                                                                                                            |
|--|-----------------------------------------------------------------------------------------------------------------------------------------------------------------------------|--|--|----------------------------|--|--|--|------------------------------------------------------------------------------------------------------------------------------------------------------------------------------------------------------------------------------------------------------------------------------------------------------------------------------------------------------------------------------------------------------------------------------------------------------------|
|  | <p>tell the adolescent to go for drugs”:<br/>Challenges in promoting health and preventing transmission among pregnant and parenting Kenyan adolescents living with HIV</p> |  |  | <p>onward transmission</p> |  |  |  | <p>disclosure to family and linkage to treatment.</p> <ul style="list-style-type: none"> <li>• They also mentioned a lack of contraceptive counseling, with some reporting multiple pregnancies.</li> <li>• Providers voiced misgivings and uncertainty about disclosing HIV diagnoses to minor adolescents without a family member present and reported severe shortages of personnel and resources to adequately serve ALHIV in rural clinics</li> </ul> |
|--|-----------------------------------------------------------------------------------------------------------------------------------------------------------------------------|--|--|----------------------------|--|--|--|------------------------------------------------------------------------------------------------------------------------------------------------------------------------------------------------------------------------------------------------------------------------------------------------------------------------------------------------------------------------------------------------------------------------------------------------------------|

|    |                                                                                |                            |              |                                                                                                                                                                                                                         |                    |       |      |                                                                                                                                                                      |
|----|--------------------------------------------------------------------------------|----------------------------|--------------|-------------------------------------------------------------------------------------------------------------------------------------------------------------------------------------------------------------------------|--------------------|-------|------|----------------------------------------------------------------------------------------------------------------------------------------------------------------------|
| 19 | HIV incidence among pregnant and postpartum women in a high prevalence setting | Machekan o et al 2018 [29] | Lesotho      | To estimate HIV incidence during pregnancy and postpartum and factors associated with HIV acquisition in a cohort of HIV-negative women presenting for antenatal care services at selected health facilities in Lesotho | Quantitative Study | 21.3% | 4.4% | <ul style="list-style-type: none"> <li>The estimated HIV incidence rate during pregnancy was almost double the estimated HIV incidence during postpartum.</li> </ul> |
| 20 | Adolescent pregnancy and                                                       | Mchunu et al 2016 [30]     | South Africa | To assess the prevalence of adolescent                                                                                                                                                                                  | Quantitative Study | 19.2% | 8.5% | <ul style="list-style-type: none"> <li>19.2% said that they had an adolescent pregnancy, while 5.8% of male youth</li> </ul>                                         |

|  |                                                  |  |  |                                                                                                                                                                                                                                                     |  |  |                                                                                                                                                                                                                                                                                                                                                                                                                                                                             |
|--|--------------------------------------------------|--|--|-----------------------------------------------------------------------------------------------------------------------------------------------------------------------------------------------------------------------------------------------------|--|--|-----------------------------------------------------------------------------------------------------------------------------------------------------------------------------------------------------------------------------------------------------------------------------------------------------------------------------------------------------------------------------------------------------------------------------------------------------------------------------|
|  | <p>associated factors in South African youth</p> |  |  | <p>pregnancy and associated factors in the South African context, as part of a population-based household survey that formed part of an evaluation of the impact of loveLife, South Africa's national HIV prevention campaign for young people.</p> |  |  | <p>indicated that they had impregnated a girl when they were an adolescent.</p> <ul style="list-style-type: none"> <li>• 16.2% of the women indicated that they ever had an unwanted pregnancy and 6.7% had ever terminated a pregnancy.</li> <li>• It was found that being employed or unemployed, greater poverty, having higher sexually permissive attitudes and scoring higher on the contraceptive or the condom use index were associated with adolescent</li> </ul> |
|--|--------------------------------------------------|--|--|-----------------------------------------------------------------------------------------------------------------------------------------------------------------------------------------------------------------------------------------------------|--|--|-----------------------------------------------------------------------------------------------------------------------------------------------------------------------------------------------------------------------------------------------------------------------------------------------------------------------------------------------------------------------------------------------------------------------------------------------------------------------------|

|    |                                                                                                         |                                         |                             |                                                                                                                                                            |  |     |      |                                                                                                                                  |
|----|---------------------------------------------------------------------------------------------------------|-----------------------------------------|-----------------------------|------------------------------------------------------------------------------------------------------------------------------------------------------------|--|-----|------|----------------------------------------------------------------------------------------------------------------------------------|
|    |                                                                                                         |                                         |                             |                                                                                                                                                            |  |     |      | pregnancy, and among men wanting the pregnancy and having a sense of the future were associated with adolescent pregnancy.       |
| 21 | Adolescent pregnancy at antiretroviral therapy (ART) initiation: a critical barrier to retention on ART | Nuwagaba - Biribonwo ha et al 2018 [31] | Kenya, Tanzania, and Uganda | To explore and quantify the impact and interactions between age, pregnancy, and site-level factors on LTFU among Adolescents Initiating ART in East Africa |  | 23% | 100% | <ul style="list-style-type: none"> <li>• Older adolescents experienced higher risk of LTFU compared to YA and adults.</li> </ul> |

|    |                                                                                                                                                    |                       |       |                                                                                                                                                                                    |                    |       |      |                                                                                                                                                                                                                                                                                                                       |
|----|----------------------------------------------------------------------------------------------------------------------------------------------------|-----------------------|-------|------------------------------------------------------------------------------------------------------------------------------------------------------------------------------------|--------------------|-------|------|-----------------------------------------------------------------------------------------------------------------------------------------------------------------------------------------------------------------------------------------------------------------------------------------------------------------------|
| 22 | Factors associated with unintended pregnancy, poor birth outcomes and post-partum contraceptive use among HIV-positive female adolescents in Kenya | Obare et al 2012 [32] | Kenya | To examine the factors associated with experiencing unintended pregnancies, poor birth outcomes, and post-partum contraceptive use among HIV-positive female adolescents in Kenya. | Quantitative Study | 49.4% | 100% | <ul style="list-style-type: none"> <li>• The experience of repeat unintended pregnancies among HIV-positive female adolescents in the sample is partly due to inconsistent use of contraception to prevent recurrence while poor birth outcomes among higher order pregnancies are partly due to abortion.</li> </ul> |
| 23 | Adolescent                                                                                                                                         | Ramraj et             | South | To quantify the risk                                                                                                                                                               | Quantitative       | 100%  | 100% | <ul style="list-style-type: none"> <li>• Adolescent mothers,</li> </ul>                                                                                                                                                                                                                                               |



|    |                                                                   |                       |        |                                                                                                                                                        |                    |       |      |                                                                                                                                                                                                                                                                    |
|----|-------------------------------------------------------------------|-----------------------|--------|--------------------------------------------------------------------------------------------------------------------------------------------------------|--------------------|-------|------|--------------------------------------------------------------------------------------------------------------------------------------------------------------------------------------------------------------------------------------------------------------------|
|    | Access to Care and Risk of Early Mother-to-Child HIV Transmission | al 2018 [33]          | Africa | of early mother-to-child transmission (MTCT) of HIV among adolescents enrolled in nationally representative MTCT surveillance studies in South Africa. | Study              |       |      | <p>compared with adult mothers, have almost three times less planned pregnancies 14.4%</p> <ul style="list-style-type: none"> <li>• Gestational age at first antenatal care booking was the only significant predictor of early MTCT among adolescents.</li> </ul> |
| 24 | Teen pregnancy in rural western Kenya: a public health issue      | Omoró et al 2018 [34] | Kenya  | To determine among western Kenyan teenage girls: (1) the proportion who reported a history of pregnancy and the                                        | Quantitative Study | 23.3% | 4.6% | <ul style="list-style-type: none"> <li>• Over a third (37.2%) were sexually active and 23.3% had ever been pregnant.</li> <li>• Adjusted odds of reporting a history of pregnancy were</li> </ul>                                                                  |

|  |  |  |                                                                                                                                                                                                                                                                           |  |  |  |                                                                                                                                                                                                                                                                                               |
|--|--|--|---------------------------------------------------------------------------------------------------------------------------------------------------------------------------------------------------------------------------------------------------------------------------|--|--|--|-----------------------------------------------------------------------------------------------------------------------------------------------------------------------------------------------------------------------------------------------------------------------------------------------|
|  |  |  | <p>proportion who reported an unwanted pregnancy in the last 12 months; (2) demographic and risk factors associated with those who reported a history of pregnancy and demographic and risk factors associated with those who reported an unwanted pregnancy; and (3)</p> |  |  |  | <p>greater for older compared to younger teens, teens who were ever married or cohabiting compared to those who were single, teens with a primary education or less compared to those with a higher level of education, and teens who experienced partner violence in the last 12 months.</p> |
|--|--|--|---------------------------------------------------------------------------------------------------------------------------------------------------------------------------------------------------------------------------------------------------------------------------|--|--|--|-----------------------------------------------------------------------------------------------------------------------------------------------------------------------------------------------------------------------------------------------------------------------------------------------|

|    |                                                                                                                |                       |       |                                                                                           |  |       |      |                                                                                                                                                                                                                                                                                                                                          |
|----|----------------------------------------------------------------------------------------------------------------|-----------------------|-------|-------------------------------------------------------------------------------------------|--|-------|------|------------------------------------------------------------------------------------------------------------------------------------------------------------------------------------------------------------------------------------------------------------------------------------------------------------------------------------------|
|    |                                                                                                                |                       |       | contraceptive methods used by those with an unwanted pregnancy in the last 12 months.     |  |       |      |                                                                                                                                                                                                                                                                                                                                          |
| 25 | Gaps in Adolescent Engagement in Antenatal Care and Prevention of Mother-to-child HIV Transmission Services in | Ronen et al 2017 [35] | Kenya | To compare engagement in the PMTCT cascade between adult and adolescent mothers in Kenya. |  | 12.8% | 4.2% | <ul style="list-style-type: none"> <li>• Adolescents were less likely than adults to have intended pregnancy disclose their HIV status. Adolescents were less likely than adults to attend <math>\geq 4</math> ANC visits.</li> <li>• Among 2359 women without previous HIV testing, 96.1% received testing during pregnancy;</li> </ul> |

|  |       |  |  |  |  |  |  |                                                                                                                       |
|--|-------|--|--|--|--|--|--|-----------------------------------------------------------------------------------------------------------------------|
|  | Kenya |  |  |  |  |  |  | testing levels did not differ between adolescents and adults. Adolescents were less likely than adults to be on ARVs. |
|--|-------|--|--|--|--|--|--|-----------------------------------------------------------------------------------------------------------------------|

## 215 **Prevalence of Adolescent Pregnancies among those with HIV in Sub-Saharan Africa**

216 Generally, the included studies consistently highlight a positive association between adolescent  
217 motherhood and HIV infection [12, 14, 22, 27]. Specifically, young women who underwent early  
218 adolescent pregnancy showed a higher likelihood of later acquiring HIV.

219 In a South African study carried out among 326 pregnant/parenting adolescents attending  
220 prenatal clinics and postnatal and gynecology wards, HIV prevalence was 17.8% [12]. Another  
221 study in South Africa, where 341 teenagers were interviewed, reported 82.4% having their first  
222 pregnancy and 17.6% having a repeat pregnancy. Notably, a majority of the teenagers with  
223 repeat pregnancies conceived again within 24 months of the initial or most recent pregnancy  
224 [13]. A study that tested the association between adolescent motherhood and HIV across 10  
225 countries in Eastern and Southern Africa showed that nearly one in five (17.4%) of the  
226 adolescent girls included in the analysis were mothers and 5.8% were adolescent mothers with  
227 HIV [15].

228 In South Africa, the prevalence of pregnant adolescent girls who are living with HIV increased  
229 every year. In 2016, 38.8% of pregnancies occurred in adolescents  $\leq 16$  years, while 39.1% were  
230 within the 17-19 age bracket [16]. A comparable trend was observed in Zimbabwe, where 33%  
231 of young people living with HIV, aged 15 to 24, had experienced pregnancy [17]. Conversely, a  
232 study in Malawi focused on female sex workers (FSWs) revealed that 14.7% of them were  
233 between the ages of 13–19 and were living with HIV. Additionally, among the 363 participants,  
234 52.3% had encountered their first pregnancy before turning 19 years old [18].

235 In studies carried out in Kenya, the highest prevalence of pregnancy in adolescents living with  
236 HIV was observed between the ages of 17 to 19 years [19,33]. Other studies conducted within

237 the country reported that the majority of the pregnancies were reported by adolescents aged 18 or  
238 older, although most of the pregnancies had occurred when the respondents were 17 years and  
239 below [21,32]. Similarly, a longitudinal study carried out in South Africa over two years of  
240 follow-up reported that two hundred and fifty-one young women (17.74%) experienced a  
241 pregnancy when they were under the age of 19 [23].

242 Within Uganda, a study involving 518 HIV-positive pregnant women revealed that 6.8% were  
243 under the age of 20 [20]. In Kenya, a sampling of 498 HIV-positive women from both primary  
244 national and secondary Nyanza oversample surveys found that 21 individuals (4.2%) were  
245 adolescents [34].

246 Socioeconomic factors were also found to be associated with adolescent pregnancy. Low-income  
247 earners, those with no income, and those with lower levels of education were more likely to have  
248 early pregnancy in comparison to their counterparts [12,16,20,29,33,34]. They also experienced  
249 more physical and sexual violence [22, 26,33].

250 Moreover, the impact of early childbirth extended to subsequent pregnancies among adolescents  
251 living with HIV. Studies indicated that having children at a young age significantly influenced  
252 the likelihood of repeat pregnancies among this demographic [11, 12]. As the age of adolescents  
253 increased, so did the odds of experiencing repeated pregnancies, suggesting a correlation  
254 between age and the occurrence of repeat pregnancies.

### 255 **Impact of Pregnancies on Clinical Outcomes and Well-being**

256 Poor mental health has been found to be higher among adolescent mothers. Probable common  
257 mental disorder was higher among adolescent mothers living with HIV (23.0%) in comparison to  
258 non-mothers and mothers who were not living with HIV. Adolescent mothers were shown to

259 have higher prevalence of probable mental health comorbidities regardless of their HIV status,  
260 indicating that the experience of pregnancy and motherhood may contribute to a heavier burden  
261 on their mental health [4].

262 Qualitative data revealed that adolescent mothers living with HIV often cannot remain at home  
263 with their parents, either for reasons of overcrowding in the home, abuse, neglect, or financial  
264 difficulties. They are often averse to pregnancies because it brings emotional and physical burden  
265 to the already burdened person [14, 17]. Adolescent mothers' safety needs are not met. Some of  
266 them have had to stay on their own with their babies or move to unsafe communities because of  
267 the threat of violent acts against them [14].

268 Reports from included studies show that HIV-infected pregnant adolescents have challenges with  
269 long-term contraceptive continuation and consequently poorer prevention of mother-to-child  
270 HIV transmission (PMTCT) service outcomes and higher rates of mother-to-child HIV  
271 transmission among infants compared to HIV-infected pregnant adults, likely due to the poor  
272 knowledge on care among them [13, 15, 16, 19]. Adolescent mothers have lower adherence to  
273 ANC visits and ART treatments, [16,21,31, 34, 35]. This is corroborated by another study which  
274 reported a significant number of pregnant adolescents with HIV had severe immunosuppression  
275 (CD4 count 200 cells/L) or increased VLs (400 copies/mL) [15]. Adolescents also had increased  
276 risks of maternal mortality, first presentation in labour, and stillbirth. [23,31]

277 Seven studies reported the low use of maternal health care services, including use of PMTCT,  
278 skilled attendance and postnatal/postabortion care for pregnancies which might end in adverse  
279 outcomes such as miscarriage, stillbirth or abortion among HIV-positive female adolescents [12,  
280 14, 15, 18, 20, 30, 32, 34].

281  
282  
283  
284  
285  
286  
287  
288  
289  
290  
291  
292  
293  
294  
295  
296  
297  
298  
299  
300  
301  
302  
303

## **DISCUSSION**

The scoping review has presented an extensive synopsis of all available literature on adolescent mothers living with HIV in sub-Saharan Africa through the prevalence of adolescent pregnancies, including the risk factors, impacts on clinical outcomes and well-being, and the availability and effectiveness of reproductive health services.

The prevalence of pregnancies among adolescents living with HIV in Africa has long been a recognized concern. While prior studies have identified the co-occurrence of adolescent pregnancies and HIV, this review delves deeper into the dynamics of prevalence. For example, included studies reported the ages of 17 to 19 years to have the highest prevalence rates of adolescent pregnancy [18,34], while others reported that the majority of the pregnancies had occurred when the respondents were aged 17 years and below [20,22,31]. These disparities could be attributed to differences in healthcare infrastructure, HIV testing, and antiretroviral therapy availability [36,37].

This study sheds light on a significant disparity in the representation of adolescents within certain demographics, particularly in studies involving pregnant individuals living with HIV in South Africa. In both cases cited, adolescents comprised a notably lower percentage compared to their older counterparts. In the first instance, among pregnant adolescents and young pregnant women living with HIV, only 20.8% fell within the adolescent age range (13-19 years), while the older cohort (20-24 years) represented a higher proportion at 32.6%. This disparity indicates a potential discrepancy in the impact of HIV within different age groups, suggesting varying levels of vulnerability or access to healthcare services between adolescents and slightly older women.



304 Similarly, in the longitudinal study that assessed the challenges faced by adolescent versus adult  
305 mothers in rural South Africa during the initial 24 months post-birth, adolescents accounted for  
306 only 17% of the mothers. This percentage was notably lower when considering HIV seropositive  
307 cases, where only 6% of adolescent mothers were identified as HIV positive. This finding, in  
308 contrast to their adult counterparts, highlights a significant difference in HIV prevalence between  
309 adolescent and adult mothers. The lower representation of adolescents in these studies might  
310 reflect several underlying factors. There could be differences in healthcare-seeking behaviors,  
311 access to reproductive health education, or social support systems between adolescents and older  
312 individuals. It could also signify varying levels of vulnerability or risk perception among these  
313 age groups regarding HIV and pregnancy.

314 Understanding these disparities is crucial for developing targeted interventions and support  
315 systems that address the specific needs and challenges faced by adolescents, especially pregnant  
316 adolescents living with HIV. It emphasizes the necessity of tailored healthcare services and  
317 comprehensive support frameworks to bridge the gap and ensure equitable care and resources for  
318 all demographics, irrespective of age.

319 The study also showed that HIV prevalence was higher among adolescent mothers in comparison  
320 to adolescent non-mothers. This is in contrast to a study in South Africa where adolescent  
321 mothers were less likely to be living with HIV compared to never-pregnant adolescents within  
322 the sample (55.5% vs. 73.3%). The prevalence of adolescent motherhood in the sample was  
323 15.2%, and almost all (98.8%) pregnancies were unplanned or unwanted [4]. Studies have shown  
324 that adolescents were more likely to report having had at least one unwanted pregnancy [17, 29].

325 Existing studies have shown that early sexual debut is a significant risk factor for both  
326 unintended pregnancies and HIV infection due to various factors such as limited knowledge

327 about safe sex practices, lack of access to contraceptives, and potential engagement in risky  
328 sexual behaviours [38,39]. This may also be linked to adolescent mothers learning of their HIV  
329 status for the first time when they confirm that they are pregnant [30,40]. This review also  
330 highlights that adolescent mothers are more likely to be involved in relationships where they  
331 have poor relationship power, gender inequitable norms, intimate partner violence, and little HIV  
332 preventive communication with higher-risk partners [43,44, 41,42].

333 The association between lower education levels and higher repeat pregnancies among  
334 adolescents living with HIV, suggests that improving educational opportunities and knowledge  
335 about reproductive health may play a crucial role in preventing repeated pregnancies in this  
336 vulnerable group [45,46]. Additionally, the role of poverty in early pregnancies is a common  
337 thread in many studies. Poverty often limits access to contraceptives, healthcare, and  
338 comprehensive reproductive health education [46,47]. Targeted interventions that address  
339 economic disparities are imperative. The prevention of adolescent pregnancies and HIV goes  
340 beyond healthcare; it involves broader socio-economic and educational support. The findings of  
341 this review emphasize the importance of holistic interventions that encompass not only clinical  
342 care but also social and economic empowerment

343 Mental health challenges among adolescent mothers living with HIV are a shared concern, as  
344 evidenced by the high prevalence of probable mental health disorders in this population [4,48].  
345 Stigma, lack of social support, poverty, and the timing of HIV diagnosis may contribute to these  
346 mental health challenges [48].

347 Hindrances in relation to access, utilization, and the quality of services are common themes in  
348 this review. Issues such as service availability in rural areas and shortages of well-trained

349 personnel are shared concerns. Geographic disparities and socio-economic barriers also hinder  
350 access to essential care [13,27]. While the South African government provides free services such  
351 as counselling, child support grants, food parcels, housing and social grants to adolescent  
352 mothers living with HIV, these services are often not accessible to those who stay in rural  
353 communities and are far from social welfare offices [13]. Smaller rural clinics, which are often  
354 more accessible to these adolescents, also have to deal with the shortage of well-trained  
355 personnel and insufficient staffing as a hindrance to achieving effective adolescent care [27].

356 The included studies underscore notable negligence in meeting the reproductive health needs of  
357 individuals transitioning from childhood to adulthood. Often, practical solutions for sexually  
358 active adolescents, or those intending to be sexually active, are lacking. Emphasis tends to  
359 revolve around advocating abstinence from sexual intercourse without providing comprehensive  
360 and practical guidance or support [30, 31].

## 361 **RECOMMENDATIONS**

362 This study suggests that larger facilities, such as referral hospitals, may be better equipped to  
363 offer adolescent-friendly PMTCT services that emphasize confidentiality, address stigma related  
364 to HIV infection and adolescent pregnancy, and integrate models of increasing social support.  
365 Contact with antenatal and postnatal care services and HIV care services for adolescents living  
366 with HIV also provide an opportunity to merge differing branches of health service through  
367 providing screening, monitoring, and referral for mental health.

368 The results from this study also recommend the need for integrated mental health services within  
369 reproductive health care programs tailored to the unique needs of adolescent mothers in SSA.  
370 Challenges faced by adolescent mothers living with HIV, including accelerated disease

371 progression and heightened mental health issues, were highlighted in this review. Research has  
372 repeatedly identified stigma, lack of social support, parenting stress, and knowledge gaps as  
373 factors contributing to mental health challenges [4,48]. This highlights the necessity for a more  
374 holistic approach, one that goes beyond advocating abstinence and includes comprehensive  
375 reproductive health education, access to contraceptives, support for safer sexual practices, and  
376 tailored interventions for adolescents living with HIV who are navigating parenthood.  
377 Addressing these gaps is vital to ensure the well-being and reproductive health empowerment of  
378 adolescent mothers living with HIV.

379 **Funding:** “This research received no external funding.”

380

381 **Acknowledgement:** This work was supported by the Nigerian Institute of Medical Research,  
382 Lead City Univeristy, and Fogarty-IeDEA Mentorship Program (FIMP), West Africa.

383

384 **Data Availability Statement:** The data used to support the findings of this study are available  
385 from the corresponding author upon request.

386

387 **Conflicts of Interest:** “The authors declare no conflict of interest.”

388

389 **References**

- 390 1. Sully, Elizabeth. 2020. “Adding It Up: Investing in Sexual and Reproductive Health  
391 2019.” Guttmacher Institute. July 10, 2020. [https://www.guttmacher.org/report/adding-it-](https://www.guttmacher.org/report/adding-it-up-investing-in-sexual-reproductive-health-2019)  
392 [up-investing-in-sexual-reproductive-health-2019](https://www.guttmacher.org/report/adding-it-up-investing-in-sexual-reproductive-health-2019).
- 393 2. Maharaj, Niren Ray. 2022. “Adolescent Pregnancy in Sub-Saharan Africa – a Cause for  
394 Concern.” *Frontiers in Reproductive Health* 4 (December).  
395 <https://doi.org/10.3389/frph.2022.984303>.
- 396 3. Kassa, Getachew Mulu, A. O. Arowojolu, A. A. Odukojbe, and Alemayehu Worku  
397 Yalew. 2018. “Prevalence and Determinants of Adolescent Pregnancy in Africa: A  
398 Systematic Review and Meta-Analysis.” *Reproductive Health* 15 (1).  
399 <https://doi.org/10.1186/s12978-018-0640-2>.
- 400 4. Roberts, Kathryn J., Colette Smith, Lucie Cluver, Elona Toska, Siyanai Zhou, Mark  
401 Boyes, and Lorraine Sherr. 2021. “Adolescent Motherhood and HIV in South Africa:  
402 Examining Prevalence of Common Mental Disorder.” *AIDS and Behavior* 26  
403 (September). <https://doi.org/10.1007/s10461-021-03474-8>.
- 404 5. Unicef. 2022. “Adolescent HIV Prevention - UNICEF DATA.” UNICEF DATA. 2022.  
405 <https://data.unicef.org/topic/hivaids/adolescents-young-people/>.
- 406 6. Calabrese, Samantha, Sonia Lee, Sonia Lee, Susannah Allison, Gina Brown, Patrick  
407 Jean-Philippe, Nahida Chakhtoura, Jack Moye, and Bill G Kapogiannis. 2023.  
408 “Adolescent and Young Adult Research across the HIV Prevention and Care Continua:  
409 An International Programme Analysis and Targeted Review.” *Journal of the*  
410 *International AIDS Society* 26 (3). <https://doi.org/10.1002/jia2.26065>.
- 411 7. Toska, Elona, Christina A. Laurenzi, Kathryn J. Roberts, Lucie Cluver, and Lorraine  
412 Sherr. 2020. “Adolescent Mothers Affected by HIV and Their Children: A Scoping

- 413 Review of Evidence and Experiences from Sub-Saharan Africa.” *Global Public Health*  
414 15 (11): 1655–73. <https://doi.org/10.1080/17441692.2020.1775867>.
- 415 8. Arksey H, O’Malley L. Scoping studies: towards a methodological framework. *Int J Soc*  
416 *Res Methodol*. 2005;8(1): 19-32.
- 417 9. Tricco AC, Lillie E, Zarin W, O’Brien KK, Colquhoun H, Levac D et al. PRISMA  
418 extension for scoping reviews (PRISMA-ScR): checklist and explanation. *Ann Int Med*,  
419 2018;169(7):467-73)
- 420 10. Moher D, Shamseer L, Clarke M, Ghersi D, Liberati A, Petticrew M, et al. Preferred  
421 reporting items for systematic review and meta-analysis protocols (PRISMA-P) 2015  
422 statement. *Syst Rev*. 2015; 4(1):1.
- 423 11. Elsevier. “Clinical Questions: PICO and PEO Research | Author Services Blog.” Elsevier  
424 Author Services - Articles. Elsevier, 2021. [https://scientific-](https://scientific-publishing.webshop.elsevier.com/research-process/clinical-questions-pico-and-peo-research/)  
425 [publishing.webshop.elsevier.com/research-process/clinical-questions-pico-and-peo-](https://scientific-publishing.webshop.elsevier.com/research-process/clinical-questions-pico-and-peo-research/)  
426 [research/](https://scientific-publishing.webshop.elsevier.com/research-process/clinical-questions-pico-and-peo-research/).
- 427 12. Desiree Govender, Saloshni Naidoo and Myra Taylor. “Prevalence and Risk Factors of  
428 Repeat Pregnancy among South African Adolescent Females” *Afr J Reprod Health* 2019;  
429 23[1]: 73-87.
- 430 13. MphatsweW, et al, Prevalence of repeat pregnancies and associated factors among  
431 teenagers in KwaZulu-Natal, South Africa, *Int J Gynecol Obstet* (2016),  
432 <http://dx.doi.org/10.1016/j.ijgo.2015.09.028>
- 433 14. Ilze Slabbert, Tasneemah Cornelissen-Nordien and Nomfundo Thokozile Singwayo. The  
434 needs of HIV-positive teenage mothers within a South African socio-cultural context  
435 Experiences of social service providers

- 436 15. Groves, Allison K., Luwam T. Gebrekristos, Patrick D. Smith, Kirsten Stoebenau, Marie  
437 C. Stoner, Wole Ameyan, and Alex C. Ezeh. 2022. “Adolescent Mothers in Eastern and  
438 Southern Africa: An Overlooked and Uniquely Vulnerable Subpopulation in the Fight  
439 against HIV.” *Journal of Adolescent Health* 70 (6): 895–901.  
440 <https://doi.org/10.1016/j.jadohealth.2021.12.012>.
- 441 16. Anderson, K, T Mutemaringa, K-G Technau, L F Johnson, K Braithwaite, E Mokotoane,  
442 A Boule, and M-A Davies, on behalf of IeDEA-SA Pediatrics. 2021. “The next  
443 Generation: Pregnancy in Adolescents and Women Living with Perinatally Acquired HIV  
444 in South Africa.” *South African Medical Journal* 111 (3): 260.  
445 <https://doi.org/10.7196/samj.2021.v111i3.14987>.
- 446 17. Norman, Makunika. 2021. “Pregnancy and Childbearing among Adolescents and Young  
447 Persons Living with HIV: The Case of Chitungwiza, Harare.” *International Journal of*  
448 *Sexual and Reproductive Health Care*, 067–72. <https://doi.org/10.17352/ijsrhc.000026>.
- 449 18. Bossard, Claire, Menard Chihana, Sarala Nicholas, Damian Mauambeta, Dina Weinstein,  
450 Nolwenn Conan, Elena Nicco, et al. 2022. “HIV, Sexual Violence, and Termination of  
451 Pregnancy among Adolescent and Adult Female Sex Workers in Malawi: A Respondent-  
452 Driven Sampling Study.” *PLoS ONE* 17 (12): e0279692–92.  
453 <https://doi.org/10.1371/journal.pone.0279692>.
- 454 19. Silas Onyango Awuor. 2021. “Prevalence of Pregnancy among Adolescent Living with  
455 HIV in Muhoroni Sub County Kisumu County, Kenya.” *Annals of Obstetrics and*  
456 *Gynecology* 9 (1): 7. <https://doi.org/10.11648/j.ijacm.20210901.12>.
- 457 20. Napyo, Agnes, Victoria Nankabirwa, David Mukunya, Josephine Tumuhamyé, Grace  
458 Ndeezi, Anna Agnes Ojok Arach, Beatrice Odongkara, Paul Waako, Thorkild Tylleskär,



- 459 and James K. Tumwine. 2020. “Prevalence and Predictors for Unintended Pregnancy  
460 among HIV-Infected Pregnant Women in Lira, Northern Uganda: A Cross-Sectional  
461 Study.” *Scientific Reports* 10 (1). <https://doi.org/10.1038/s41598-020-73490-6>.
- 462 21. Birungi, Harriet, Francis Obare, Anke van der Kwaak, and Jane Harriet Namwebya.  
463 2011. “Maternal Health Care Utilization among HIV-Positive Female Adolescents in  
464 Kenya.” *International Perspectives on Sexual and Reproductive Health* 37 (03): 143–49.  
465 <https://doi.org/10.1363/3714311>.
- 466 22. Carbone, Nicole B., Joseph Njala, Debra J. Jackson, Michael T. Eliya, Chileshe  
467 Chilangwa, Jennifer Tseka, Tasila Zulu, et al. 2019. “‘I Would Love If There Was a  
468 Young Woman to Encourage Us, to Ease Our Anxiety Which We Would Have If We  
469 Were Alone’: Adapting the Mothers2Mothers Mentor Mother Model for Adolescent  
470 Mothers Living with HIV in Malawi.” Edited by Mellissa H Withers. *PLOS ONE* 14 (6):  
471 e0217693. <https://doi.org/10.1371/journal.pone.0217693>.
- 472 23. Christofides, Nicola J, Rachel K Jewkes, Kristin L Dunkle, Mzikazi Nduna, Nwabisa  
473 Jama Shai, and Claire Sterk. 2014. “Early Adolescent Pregnancy Increases Risk of  
474 Incident HIV Infection in the Eastern Cape, South Africa: A Longitudinal Study.” *Journal*  
475 *of the International AIDS Society* 17 (1): 18585. <https://doi.org/10.7448/ias.17.1.18585>.
- 476 24. Fatti, Geoffrey, Najma Shaikh, Brian Eley, Debra Jackson, and Ashraf Grimwood. 2014.  
477 “Adolescent and Young Pregnant Women at Increased Risk of Mother-To-Child  
478 Transmission of HIV and Poorer Maternal and Infant Health Outcomes: A Cohort Study  
479 at Public Facilities in the Nelson Mandela Bay Metropolitan District, Eastern Cape, South  
480 Africa.” *South African Medical Journal* 104 (12): 874. <https://doi.org/10.7196/samj.8207>.

- 481 25. Jama, Ngcwalisa Amanda, Aurene Wilford, Lyn Haskins, Anna Coutsoydis, Lenore  
482 Spies, and Christiane Horwood. 2018. "Autonomy and Infant Feeding Decision-Making  
483 among Teenage Mothers in a Rural and Urban Setting in KwaZulu-Natal, South Africa."  
484 BMC Pregnancy and Childbirth 18 (1). <https://doi.org/10.1186/s12884-018-1675-7>.
- 485 26. Josephine, Adeagbo Morolake. 2019. "'Motherhood Is Hard': Exploring the  
486 Complexities of Unplanned Motherhood among HIV-Positive Adolescents in South  
487 Africa." SAGE Open 9 (2): 215824401984880.  
488 <https://doi.org/10.1177/2158244019848802>.
- 489 27. Roux, Karl le, Joan Christodoulou, Linnea Stansert-Katzen, Elaine Dippenaar, Christina  
490 Laurenzi, Ingrid M. le Roux, Mark Tomlinson, and Mary Jane Rotheram-Borus. 2019. "A  
491 Longitudinal Cohort Study of Rural Adolescent vs Adult South African Mothers and  
492 Their Children from Birth to 24 Months." BMC Pregnancy and Childbirth 19 (1).  
493 <https://doi.org/10.1186/s12884-018-2164-8>.
- 494 28. Luseno, Winnie K., Bonita J. Iritani, Suzanne Maman, Isabella Mbai, Barrack Ongili,  
495 Florence Anyango Otieno, and Denise Dion Hallfors. 2019. "'If the Mother Does Not  
496 Know, There Is No Way She Can Tell the Adolescent to Go for Drugs': Challenges in  
497 Promoting Health and Preventing Transmission among Pregnant and Parenting Kenyan  
498 Adolescents Living with HIV." Children and Youth Services Review 103 (August): 100–  
499 106. <https://doi.org/10.1016/j.childyouth.2019.05.036>.
- 500 29. Machekano, Rhoderick, Appolinaire Tiam, Seble Kassaye, Vincent Tukei, Michelle Gill,  
501 Florence Mohai, Masepeli Nchepe, et al. 2018. "HIV Incidence among Pregnant and  
502 Postpartum Women in a High Prevalence Setting." Edited by Javier R. Lama. PLOS  
503 ONE 13 (12): e0209782. <https://doi.org/10.1371/journal.pone.0209782>.

- 504 30. Mchunu, G, K Peltzer, B Tutshana, and L Seutlwadi. 2013. “Adolescent Pregnancy and  
505 Associated Factors in South African Youth.” *African Health Sciences* 12 (4).  
506 <https://doi.org/10.4314/ahs.v12i4.5>.
- 507 31. Nuwagaba-Biribonwoha, Harriet, Agnes N Kiragga, Constantin T Yiannoutsos, Beverly  
508 S Musick, Kara K Wools-Kaloustian, Samuel Ayaya, Hilary Wolf, et al. 2018.  
509 “Adolescent Pregnancy at Antiretroviral Therapy (ART) Initiation: A Critical Barrier to  
510 Retention on ART.” *Journal of the International AIDS Society* 21 (9): e25178.  
511 <https://doi.org/10.1002/jia2.25178>.
- 512 32. Obare, Francis, Anke van der Kwaak, and Harriet Birungi. 2012. “Factors Associated  
513 with Unintended Pregnancy, Poor Birth Outcomes and Post-Partum Contraceptive Use  
514 among HIV-Positive Female Adolescents in Kenya.” *BMC Women’s Health* 12 (1).  
515 <https://doi.org/10.1186/1472-6874-12-34>.
- 516 33. Ramraj, Trisha, Debra Jackson, Thu-Ha Dinh, Steve Olorunju, Carl Lombard, Gayle  
517 Sherman, Adrian Puren, et al. 2018. “Adolescent Access to Care and Risk of Early  
518 Mother-To-Child HIV Transmission.” *Journal of Adolescent Health* 62 (4): 434–43.  
519 <https://doi.org/10.1016/j.jadohealth.2017.10.007>.
- 520 34. Omoro, Tereza, Simone C. Gray, George Otieno, Calvin Mbeda, Penelope A. Phillips-  
521 Howard, Tameka Hayes, Fredrick Otieno, and Deborah A. Gust. 2017. “Teen Pregnancy  
522 in Rural Western Kenya: A Public Health Issue.” *International Journal of Adolescence  
523 and Youth*, December, 1–10. <https://doi.org/10.1080/02673843.2017.1402794>.

- 524 35. Ronen, Keshet, Christine J. McGrath, Agnes C. Langat, John Kinuthia, Danvers Omolo,  
525 Benson Singa, Abraham K. Katana, Lucy W. Ngang'A, and Grace John-Stewart.  
526 2017. "Gaps in Adolescent Engagement in Antenatal Care and Prevention of Mother-To-  
527 Child HIV Transmission Services in Kenya." *JAIDS Journal of Acquired Immune*  
528 *Deficiency Syndromes* 74 (1): 30–37. <https://doi.org/10.1097/qai.0000000000001176>
- 529 36. Mandiwa, Chrispin, Bernadetta Namondwe, and Mtondera Munthali. 2021. "Prevalence  
530 and Correlates of Comprehensive HIV/AIDS Knowledge among Adolescent Girls and  
531 Young Women Aged 15–24 Years in Malawi: Evidence from the 2015–16 Malawi  
532 Demographic and Health Survey." *BMC Public Health* 21 (1).  
533 <https://doi.org/10.1186/s12889-021-11564-4>.
- 534 37. Mabaso, Musawenkosi, Goitseone Maseko, Ronel Sewpaul, Inbarani Naidoo, Sean  
535 Jooste, Sinovuyo Takatshana, Tarylee Reddy, Khangelani Zuma, and Nompumelelo  
536 Zungu. 2021. "Trends and Correlates of HIV Prevalence among Adolescents in South  
537 Africa: Evidence from the 2008, 2012 and 2017 South African National HIV Prevalence,  
538 Incidence and Behaviour Surveys." *AIDS Research and Therapy* 18 (1).  
539 <https://doi.org/10.1186/s12981-021-00422-3>.
- 540 38. Dine, Roseline Dzekem, Oluwaseun Adebayo Bamodu, and Joseph Ntaganira. 2021.  
541 "Youth Health Risk Behavior: Effects of Early Sexual Debut on HIV Incidence among  
542 Rwandan Youth." *Journal of Public Health*, June. [https://doi.org/10.1007/s10389-021-](https://doi.org/10.1007/s10389-021-01617-8)  
543 [01617-8](https://doi.org/10.1007/s10389-021-01617-8).
- 544 39. Ningpuanyeh, Wilson C, and A Sathiya Susuman. 2016. "Correlates of Early Sexual  
545 Debut and Its Associated STI/HIV Risk Factors among Sexually Active Youths in

- 546 Malawi.” *Journal of Asian and African Studies* 52 (8): 1213–24.  
547 <https://doi.org/10.1177/0021909616654300>.
- 548 40. Madiba, Sphiwe, and Mamorapeli Putsoane. 2020. “Testing Positive and Disclosing in  
549 Pregnancy: A Phenomenological Study of the Experiences of Adolescents and Young  
550 Women in Maseru, Lesotho.” *AIDS Research and Treatment* 2020 (February): 1–8.  
551 <https://doi.org/10.1155/2020/6126210>.
- 552 41. Bermudez, Laura Gauer, Drosin Mulenga, Maurice Musheke, and Sanyukta Mathur.  
553 2021. “Intersections of Financial Agency, Gender Dynamics, and HIV Risk: A  
554 Qualitative Study with Adolescent Girls and Young Women in Zambia.” *Global Public  
555 Health*, July, 1–14. <https://doi.org/10.1080/17441692.2021.1951800>.
- 556 42. Crankshaw, Tamaryn L., Samantha Chareka, Pemberai Zambezi, and Nana K. Poku.  
557 2021. “Age Matters: Determinants of Sexual and Reproductive Health Vulnerabilities  
558 amongst Young Women Who Sell Sex (16–24 Years) in Zimbabwe.” *Social Science &  
559 Medicine* 270 (February): 113597. <https://doi.org/10.1016/j.socscimed.2020.113597>.
- 560 43. Bhushan, Nivedita L., Marie C.D. Stoner, Allison K. Groves, Kathleen Kahn, and Audrey  
561 E. Pettifor. 2022. “Partnership Dynamics and HIV-Related Sexual Behaviors among  
562 Adolescent Mothers in South Africa: A Longitudinal Analysis of HIV Prevention Trials  
563 Network 068 Data.” *Journal of Adolescent Health*, March.  
564 <https://doi.org/10.1016/j.jadohealth.2022.02.003>.
- 565 44. Groves, Allison K., Luwam T. Gebrekristos, Luz McNaughton Reyes, Dhayendre  
566 Moodley, and Suzanne Maman. 2020. “Describing Relationship Characteristics and

- 567 Postpartum HIV Risk among Adolescent, Young Adult, and Adult Women in South  
568 Africa.” *Journal of Adolescent Health* 67 (1): 123–26.  
569 <https://doi.org/10.1016/j.jadohealth.2019.12.008>.
- 570 45. Marphatia, Akanksha A., Naomi M. Saville, Gabriel S. Amable, Dharma S. Manandhar,  
571 Mario Cortina-Borja, Jonathan C. Wells, and Alice M. Reid. 2020. “How Much  
572 Education Is Needed to Delay Women’s Age at Marriage and First Pregnancy?”  
573 *Frontiers in Public Health* 7 (January). <https://doi.org/10.3389/fpubh.2019.00396>.
- 574 46. Akombi-Inyang, Blessing Jaka, Emma Woolley, Chinonyerem Ogadi Iheanacho, Khulan  
575 Bayaraa, and Pramesh Raj Ghimire. 2022. “Regional Trends and Socioeconomic  
576 Predictors of Adolescent Pregnancy in Nigeria: A Nationwide Study.” *International  
577 Journal of Environmental Research and Public Health* 19 (13): 8222.  
578 <https://doi.org/10.3390/ijerph19138222>.
- 579 47. Worku, Misganaw Gebrie, Zemenu Tadesse Tessema, Achamyeh Birhanu Teshale,  
580 Getayeneh Antehunegn Tesema, and Yigizie Yeshaw. 2021. “Prevalence and Associated  
581 Factors of Adolescent Pregnancy (15–19 Years) in East Africa: A Multilevel Analysis.”  
582 *BMC Pregnancy and Childbirth* 21 (1). <https://doi.org/10.1186/s12884-021-03713-9>.
- 583 48. Dessauvage, A. S., A. Jörens-Presentati, A.-K. Napp, D. J. Stein, D. Jonker, E. Breet, W.  
584 Charles, et al. 2020. “The Prevalence of Mental Health Problems in Sub-Saharan  
585 Adolescents Living with HIV: A Systematic Review.” *Global Mental Health* 7.  
586 <https://doi.org/10.1017/gmh.2020.18>.

587

|   | Keywords             | Search Strings                                                                                                                                                                                                                                                                                                                                                                                                                                                                     |
|---|----------------------|------------------------------------------------------------------------------------------------------------------------------------------------------------------------------------------------------------------------------------------------------------------------------------------------------------------------------------------------------------------------------------------------------------------------------------------------------------------------------------|
| 1 | Prevalence           | ((TS=(Prevalence )) OR TS=(Epidemiology)) OR<br>TS=(Frequency) and Preprint Citation Index (Exclude –<br>Database)                                                                                                                                                                                                                                                                                                                                                                 |
| 2 | Adolescent pregnancy | (((((TS=(Adolescence, Pregnancy )) OR TS=(Teen<br>Pregnancy)) OR TS=(Pregnancy, Teen)) OR<br>TS=(Adolescent Pregnancy)) OR TS=(Pregnancy,<br>Adolescent)) OR TS=(Pregnancy, Teenage)) OR<br>TS=(Teenage Pregnancies)) OR TS=(Preteen Pregnancy))<br>OR TS=(Pregnancy, Preteen)) OR TS=(Child Pregnancy))<br>OR TS=(Girls pregnancy)) OR TS=(Adolescent mothers))<br>OR TS=(Pregnancy unplanned)) OR TS=(Pregnancy<br>unwanted) and Preprint Citation Index (Exclude –<br>Database) |
| 3 | HIV                  | (((((TS=(Human Immunodeficiency Virus)) OR<br>TS=(Immunodeficiency Virus, Human)) OR<br>TS=(Immunodeficiency Viruses, Human)) OR TS=(Virus,<br>Human Immunodeficiency)) OR TS=(Viruses, Human<br>Immunodeficiency)) OR TS=(Human Immunodeficiency                                                                                                                                                                                                                                  |

|  |  |                                                                                                                                                                                                                                                                                                                   |
|--|--|-------------------------------------------------------------------------------------------------------------------------------------------------------------------------------------------------------------------------------------------------------------------------------------------------------------------|
|  |  | Viruses)) OR TS=(Human T Cell Lymphotropic Virus Type III)) OR TS=(LAV-HTLV-III)) OR TS=(Lymphadenopathy-Associated Virus)) OR TS=(Human T Lymphotropic Virus Type III)) OR TS=(AIDS Virus)) OR TS=(Acquired Immune Deficiency Syndrome Virus)) OR TS=(HTLV-III) and Preprint Citation Index (Exclude – Database) |
|  |  |                                                                                                                                                                                                                                                                                                                   |

590 **CINAHL= 0**

|   | Keywords             | Search Strings                                                                                                 |
|---|----------------------|----------------------------------------------------------------------------------------------------------------|
| 1 | Prevalence           | TI ( prevalence or incidence or epidemiology or frequency or occurrence or statistics ) OR TI prevalence rates |
| 2 | Adolescent Pregnancy | TI adolescent pregnancy or teenage pregnancy or teen pregnancy                                                 |
| 3 | HIV                  | TI HIV or aids or acquired human immunodeficiency syndrome or human immunodeficiency virus                     |
|   |                      |                                                                                                                |

591

592 **WEB OF SCIENCE**

593 **Web of science (Number)**



| S/N | Keywords    |                                                                                                                                                                                                                                                                                                                                                                                                                                                                                                                                                                                     |
|-----|-------------|-------------------------------------------------------------------------------------------------------------------------------------------------------------------------------------------------------------------------------------------------------------------------------------------------------------------------------------------------------------------------------------------------------------------------------------------------------------------------------------------------------------------------------------------------------------------------------------|
| 1   | Pregnancy   | <p>((TS=(Pregnancy)) OR TS=(Pregnancies)) OR<br/> TS=(Gestation) and Preprint Citation Index (Exclude -<br/> Database)</p>                                                                                                                                                                                                                                                                                                                                                                                                                                                          |
| 2   | adolescents | <p>(((((TS=(adolescents)) OR TS=(Adolescence)) OR<br/> TS=(Teens)) OR TS=(Teen)) OR TS=(Teenagers)) OR<br/> TS=(Teenager)) OR TS=(Youth)) OR TS=(Youths)) OR<br/> TS=(Adolescents, Female)) OR TS=(Adolescent, Female)) OR<br/> TS=(Female Adolescent)) OR TS=(Female Adolescents)) OR<br/> TS=(Adolescents, Male)) OR TS=(Adolescent, Male)) OR<br/> TS=(Male Adolescent)) OR TS=(Male Adolescents) and Preprint<br/> Citation Index (Exclude - Database)</p>                                                                                                                      |
| 3   | HIV         | <p>(((((TS=(HIV)) OR TS=(Human<br/> Immunodeficiency Virus)) OR TS=(Immunodeficiency Virus,<br/> Human)) OR TS=(Immunodeficiency Viruses, Human)) OR<br/> TS=(Virus, Human Immunodeficiency)) OR TS=(Viruses,<br/> Human Immunodeficiency)) OR TS=(Human Immunodeficiency<br/> Viruses)) OR TS=(Human T Cell Lymphotropic Virus Type III))<br/> OR TS=(Human T-Cell Lymphotropic Virus Type III)) OR<br/> TS=(Human T-Cell Leukemia Virus Type III)) OR TS=(Human T<br/> Cell Leukemia Virus Type III)) OR TS=(LAV-HTLV-III)) OR<br/> TS=(Lymphadenopathy-Associated Virus)) OR</p> |

|   |                   |                                                                                                                                                                                                                                                                                                                                                                                                                                                                                                                                                 |
|---|-------------------|-------------------------------------------------------------------------------------------------------------------------------------------------------------------------------------------------------------------------------------------------------------------------------------------------------------------------------------------------------------------------------------------------------------------------------------------------------------------------------------------------------------------------------------------------|
|   |                   | <p>TS=(Lymphadenopathy Associated Virus)) OR</p> <p>TS=(Lymphadenopathy-Associated Viruses)) OR TS=(Virus, Lymphadenopathy-Associated)) OR TS=(Viruses, Lymphadenopathy-Associated)) OR TS=(Human T Lymphotropic Virus Type III)) OR TS=(Human T-Lymphotropic Virus Type III)) OR TS=(AIDS Virus)) OR TS=(AIDS Viruses)) OR TS=(Virus, AIDS)) OR TS=(Viruses, AIDS)) OR TS=(Acquired Immune Deficiency Syndrome Virus)) OR TS=(Acquired Immunodeficiency Syndrome Virus)) OR TS=(HTLV-III) and Preprint Citation Index (Exclude - Database)</p> |
| 4 | Sub-Sahara Africa | <p>((TS=(Sub-Sahara Africa)) OR TS=(Sub-Saharan Africa)) OR TS=(Subsaharan Africa)) OR TS=(Africa, Sub-Saharan) and Preprint Citation Index (Exclude - Database)</p>                                                                                                                                                                                                                                                                                                                                                                            |

594

595 **SCOPUS = 462**

596 (TITLE-ABS-KEY(prevalence) AND TITLE-ABS-KEY(adolescent) AND TITLE-ABS-KEY(Pregnancy) AND TITLE-  
597 ABS-KEY(HIV) AND TITLE-ABS-KEY(Africa)) AND PUBYEAR > 2001 AND PUBYEAR < 2023 AND ( LIMIT-TO (  
598 DOCTYPE,"ar" )
